# Supplementary material
Source: PubMed Central journal article supplement (PMC2447655)
Supplement: M800102200_1.pdf [file M800102200_1.pdf]

# Supplemental Data

## S1

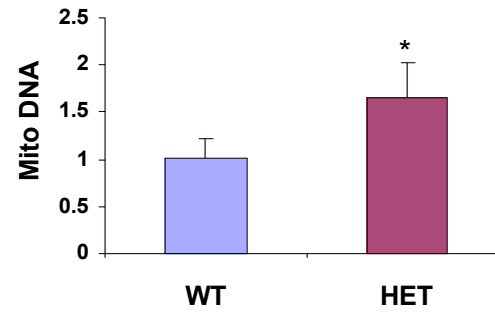

## S2

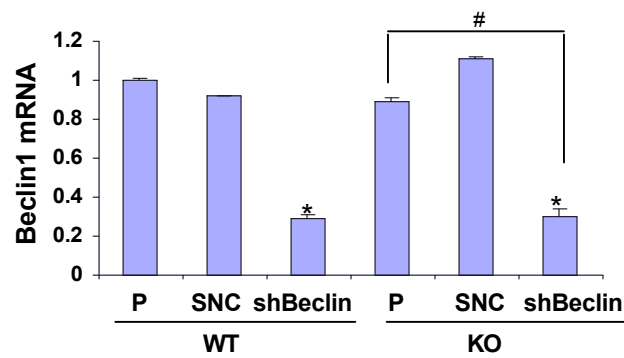

## S3

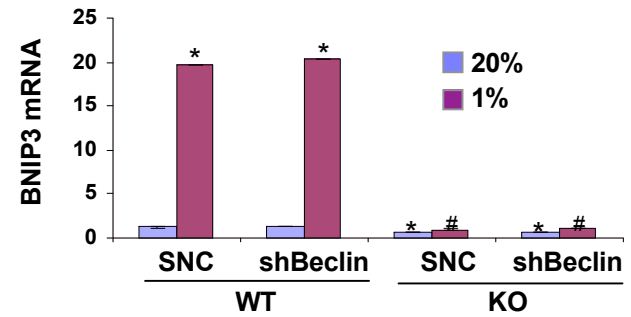

**S4**

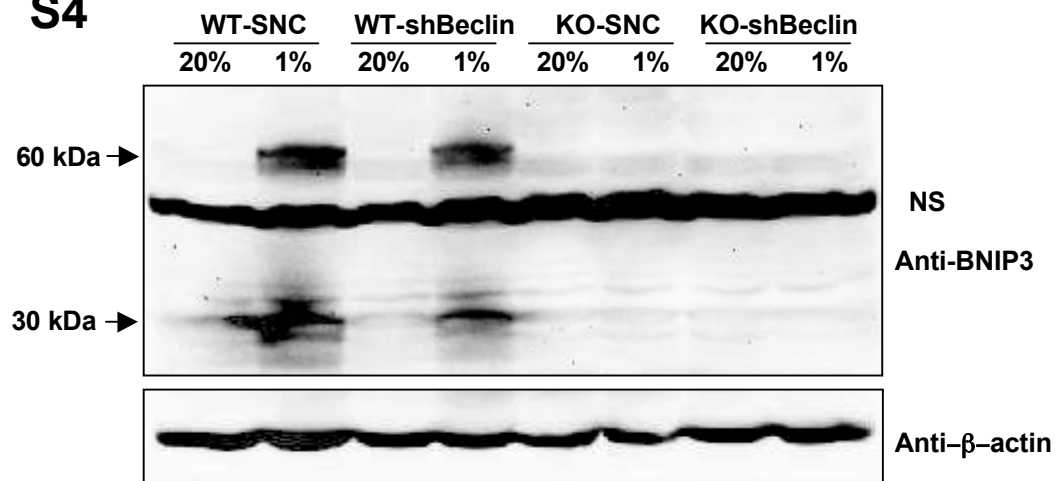

**S5**

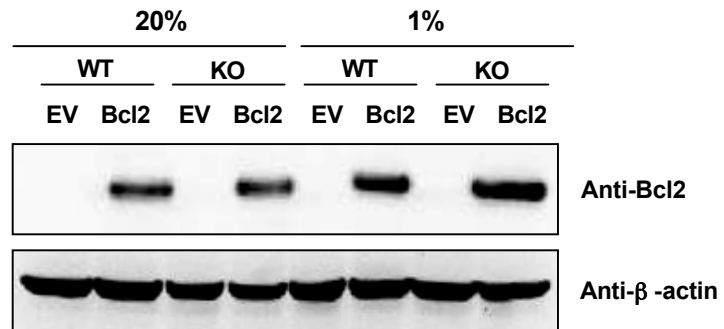

S6

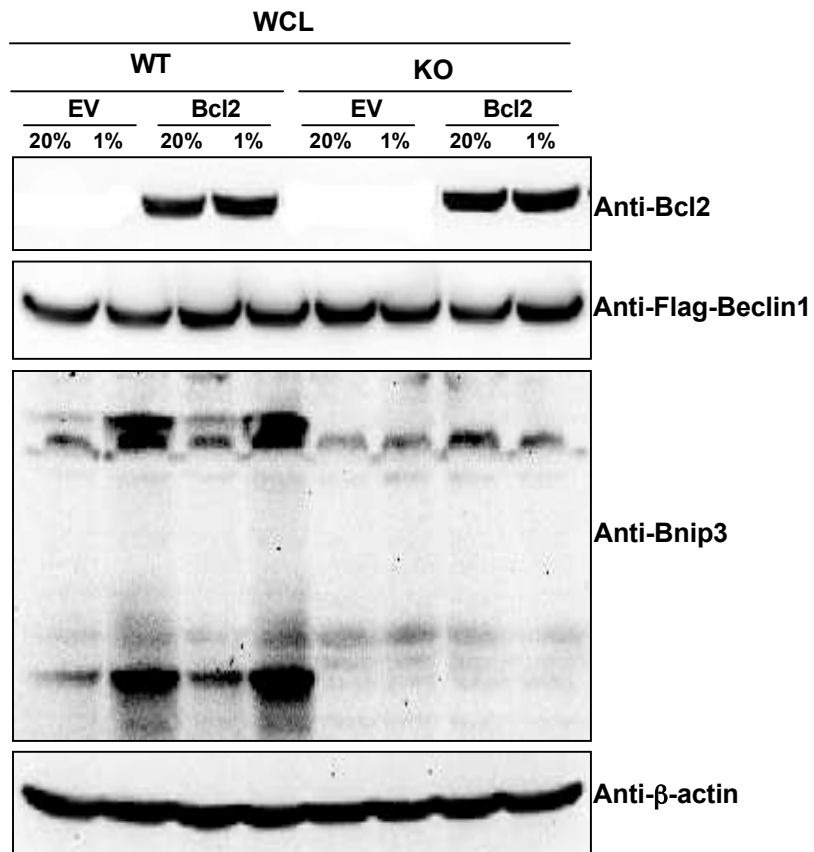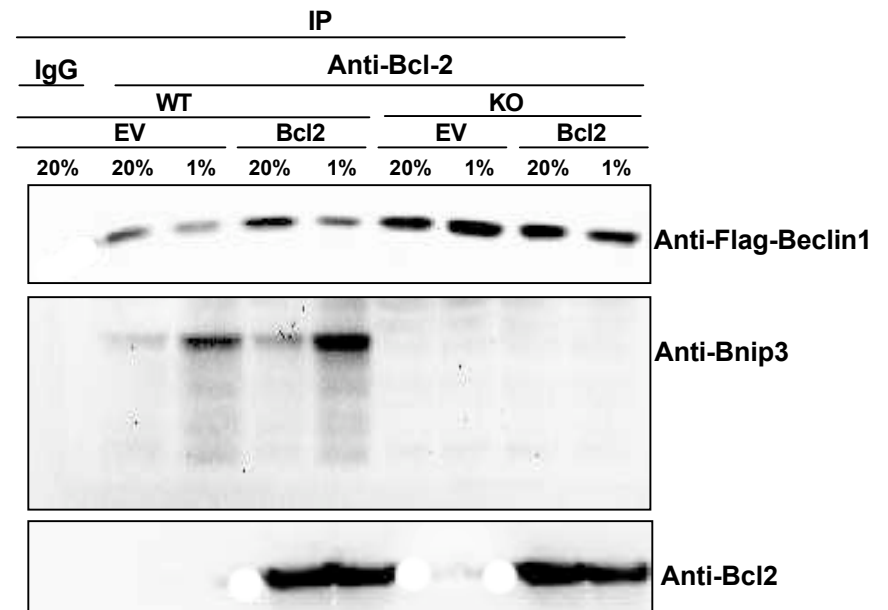

## SUPPLEMENTAL FIGURE LEGENDS

**Figure S1. Analysis of Mitochondrial DNA in Hearts of WT and HET mice** DNA was extracted from the hearts of the same mice that were analyzed in Figure 1G. The mean ( $\pm$  SEM) levels of mitochondrial DNA relative to nuclear DNA were determined by quantitative real-time PCR. \* $P < 0.05$  by Student's  $t$  test compared to WT.

**Figure S2. Analysis of Beclin-1 mRNA levels in MEFs with Beclin-1 Knockdown** Total RNA was isolated from parental WT and KO MEFs (P) and subclones expressing a scrambled negative control shRNA (SNC) or shRNA targeted against Beclin-1 (shBeclin). Mean ( $\pm$  SEM) levels of Beclin-1 mRNA were determined by quantitative real-time RT-PCR. \* $P < 0.05$  by Student's  $t$  test compared to parental cells; #  $P < 0.05$  for indicated comparison.

**Figure S3. Analysis of BNIP3 mRNA levels in MEFs with Beclin-1 Knockdown** WT and KO MEFs, which were stably transfected with SNC or shBeclin short hairpin RNA, were cultured at 20% or 1% O<sub>2</sub> for 24 h, total RNA was isolated, and mean ( $\pm$  SEM) levels of BNIP3 mRNA were determined by quantitative real-time RT-PCR. \* $P < 0.05$  by Student's  $t$  test compared to WT-SNC at 20% O<sub>2</sub>; #  $P < 0.05$  by Student's  $t$  test compared to WT-SNC at 1% O<sub>2</sub>.

**Figure S4. Analysis of BNIP3 Protein Levels in MEFs with Beclin-1 Knockdown** WT and KO MEFs, which were stably transfected with SNC or shBeclin short hairpin RNA, were cultured at 20% or 1% O<sub>2</sub> for 48 h, and cell lysates were subjected to immunoblot assays using antibodies against BNIP3 and  $\beta$ -actin as a loading control.

**Figure S5. Analysis of Bcl2-overexpressing MEFs** WT and KO MEFs that were stably transfected with empty lentiviral vector (EV) or a lentivirus encoding Bcl-2 were cultured at 20% or 1% O<sub>2</sub> for 48 h, and cell lysates were subjected to immunoblot assays using antibodies against Bcl2 and  $\beta$ -actin.

**Figure S6. Analysis of Bcl2 Interaction with BNIP3 and Beclin-1** WT and KO MEFs that were stably transfected with empty lentiviral vector (EV) or a lentivirus encoding Bcl-2 were transiently transfected with an expression vector encoding FLAG-epitope-tagged Beclin-1 and cultured at 20% or 1% O<sub>2</sub> for 48 h. Whole cell lysates (WCL) were prepared. Aliquots of WCL were analyzed directly by immunoblot assays (left panel) or after immunoprecipitation (IP) with IgG or anti-Bcl2 antibodies (right panel).

## Supplemental Table 1. shRNA information

| Accession Number | Name          | targeted sequence:                |
|------------------|---------------|-----------------------------------|
| NM_009760        | Mm Bnip3 sh80 | 5'-CAG CCT CCG TCT CTA TTT A -3'  |
|                  | Mm Bnip3 sh82 | 5'- GCC TCC GTC TCT ATT TAT A -3' |
| NM_019584        | shBeclin1     | 5'- CAG TTT GGC ACA ATC AAT A -3' |

## Supplemental Table 2. primer information

| Accession No. | Name                            | Sense Primer            | Anti-sense Primer       |
|---------------|---------------------------------|-------------------------|-------------------------|
| NC_005089     | Mus musculus mitochondrion, ND2 | CCCATTCCAATTCTGATTACC   | ATGATAGTAGAGTTGAGTAGCG  |
| NM_009760     | Mus musculus BNIP3              | ACTCAGATTGGATATGGGATTGG | GAGACAGTAACAGAGATGGAAGG |
| NM_019584     | Mus musculus Beclin 1           | AATCTAAGGAGTTGCCGTTATAC | CCAGTGTCTTCAATCTTGCC    |
| NM_053069     | Mus musculus Atg5               | CCTGAAGATGGAGAGAAGAG    | GGACAATGCTAATATGAAGAAAG |
